# Supplementary material for: Structural elucidation of a novel mechanism for the bacteriophage-based inhibition of the RNA degradosome
Source: eLife. 2016 Jul 22;5:e16413. doi: 10.7554/eLife.16413 (PMC4980113; doi:10.7554/eLife.16413)
Supplement: Figure 1—figure supplement 1—source data 1. — DOI: http://dx.doi.org/10.7554/eLife.16413.005 [file elife-16413-fig1-figsupp1-data1.xlsx]

## Sheet: Results ELISA
Dip:Degradosome (nM)	OD450nm			OD450nm -Blanco
	replica 1	replica 2	replica 3	replica 1	replica 2	replica 3	Average	STDEV
Blanco	0.034	0.032	0.039	-0.001	-0.003	0.004	-2.31296e-18	0.00360555
0:350	0.039	0.043	0.039	0.004	0.008	0.004	0.00533333	0.0023094
350:0	0.058	0.09	0.082	0.023	0.055	0.047	0.0416667	0.0166533
350:0.7	0.217	0.213	0.272	0.182	0.178	0.237	0.199	0.0329697
350:3.5	0.726	0.76	0.761	0.691	0.725	0.726	0.714	0.0199249
350:7	0.859	0.797	0.802	0.824	0.762	0.767	0.784333	0.0344432
350:35	1.015	1.037	0.996	0.98	1.002	0.961	0.981	0.0205183
350:70	1.054	1.03	1.023	1.019	0.995	0.988	1.00067	0.0162583
350:140	1.049	1.017	1.094	1.014	0.982	1.059	1.01833	0.0386825
350:350	1.041	0.971	0.876	1.006	0.936	0.841	0.927667	0.0828151
Average Blanco	0.035
