# Supplementary material for: Structural elucidation of a novel mechanism for the bacteriophage-based inhibition of the RNA degradosome
Source: eLife. 2016 Jul 22;5:e16413. doi: 10.7554/eLife.16413 (PMC4980113; doi:10.7554/eLife.16413)
Supplement: Figure 1—source data 1. — DOI: http://dx.doi.org/10.7554/eLife.16413.003 [file elife-16413-fig1-data1.xlsx]

## Sheet: Results B2H
				Miller Units							p-value
Vector1		Vector2		Rep 1	Rep 2	Rep 3	Rep 4	Rep5	Average	Stdev	cf Fragment-Empty	cf Dip-Empty
Positive control
pKT25	zip	pUT18C	zip	3957.9	4865.7	5820.1	6605.7	3742	4998.28	1218.34
Negative control
pKT25	empty	pUT18C	empty	97.1	121.2	110.1	115.1	111.7	111.04	8.87908
Control Dip
pKT25	empty	pUT18C	Dip_phiKZ	88.1	92.6	76.2			85.6333	8.47368
pKT25	empty	pUT18	Dip_phiKZ	78.8	30	18.6			42.4667	31.9777
pUT18C	empty	pKT25	Dip_phiKZ	106.3	133.1	110.7			116.7	14.3722
pUT18C	empty	pN-25	Dip_phiKZ	75	99.4	94.7			89.7	12.9457
Complete scaffold domain
pKT25	RneE_scaff	pUT18C	empty	165.2	110.1	144.3			139.867	27.8162
pKT25	RneE_scaff	pUT18	empty	117.2	125.9	107.8			116.967	9.05226
pUT18C	RneE_scaff	pKT25	empty	119.7	109.7	106.1			111.833	7.04651
pUT18C	RneE_scaff	pN-25	empty	95	89.2	86.4			90.2	4.38634
pKT25	RneE_scaff	pUT18C	Dip_phiKZ	885.7	1578.2	1702.6			1388.83	440.143	0.0192594	0.0179702
pKT25	RneE_scaff	pUT18	Dip_phiKZ	250.6	171.3	225			215.633	40.4713	0.0229641	0.00255421
pUT18C	RneE_scaff	pKT25	Dip_phiKZ	562.9	741.4	1033.1			779.133	237.36	0.0197877	0.0198959
pUT18C	RneE_scaff	pN-25	Dip_phiKZ	2892.5	3430.6	3934.3			3419.13	520.995	0.00403124	0.00401671
Fragment A
pKT25	RneE_scaff_A	pUT18C	empty	80.1	70.8	75.5			75.4667	4.65009
pKT25	RneE_scaff_A	pUT18	empty	76.5	83.5	72.5			77.5	5.56776
pUT18C	RneE_scaff_A	pKT25	empty	74.2	68.2	71.5			71.3	3.005
pUT18C	RneE_scaff_A	pN-25	empty	78.7	75.9	73.4			76	2.65141
pKT25	RneE_scaff_A	pUT18C	Dip_phiKZ	187.2	103.8	64			118.333	62.8727	0.17948	0.231667
pKT25	RneE_scaff_A	pUT18	Dip_phiKZ	58.5	56.9	59.3			58.2333	1.22202	0.0112465	0.241563
pUT18C	RneE_scaff_A	pKT25	Dip_phiKZ	68.2	73.9	70.3			70.8	2.88271	0.422713	0.0136283
pUT18C	RneE_scaff_A	pN-25	Dip_phiKZ	63.9	63.8	66.8			64.8333	1.70392	0.00296255	0.038635
Fragment B
pKT25	RneE_scaff_B	pUT18C	empty	223.8	105.9	107.7			145.8	67.556
pKT25	RneE_scaff_B	pUT18	empty	113.7	97.7	119.3			110.233	11.2095
pUT18C	RneE_scaff_B	pKT25	empty	109.8	98.5	90.9			99.7333	9.51017
pUT18C	RneE_scaff_B	pN-25	empty	97.3	119.8	104.4			107.167	11.5023
pKT25	RneE_scaff_B	pUT18C	Dip_phiKZ	108	108.6	104.2			106.933	2.38607	0.212009	0.0202403
pKT25	RneE_scaff_B	pUT18	Dip_phiKZ	114.9	112.1	100.2			109.067	7.80534	0.445182	0.0308355
pUT18C	RneE_scaff_B	pKT25	Dip_phiKZ	107.7	117.7	106.3			110.567	6.21718	0.092668	0.27533
pUT18C	RneE_scaff_B	pN-25	Dip_phiKZ	108.9	107.2	108.8			108.3	0.953939	0.440205	0.0649116
Fragment C
pKT25	RneE_scaff_C	pUT18C	empty	88.7	86.7	107.7			94.3667	11.5902
pKT25	RneE_scaff_C	pUT18	empty	102.4	93.6	121.2			105.733	14.0987
pUT18C	RneE_scaff_C	pKT25	empty	100.9	100.5	126.5			109.3	14.897
pUT18C	RneE_scaff_C	pN-25	empty	102	96.9	116.2			105.033	10.0012
pKT25	RneE_scaff_C	pUT18C	Dip_phiKZ	4193.4	4513.9	6343.3			5016.87	1159.85	0.00899971	0.00897059
pKT25	RneE_scaff_C	pUT18	Dip_phiKZ	789.5	1617.9	697.2			1034.87	507.026	0.0432268	0.0382551
pUT18C	RneE_scaff_C	pKT25	Dip_phiKZ	4411.1	4019.8	6001.3			4810.73	1049.46	0.0080956	0.00812106
pUT18C	RneE_scaff_C	pN-25	Dip_phiKZ	2538	2185.3	3098.3			2607.2	460.417	0.00553511	0.00545942
Fragment D
pKT25	RneE_scaff_D	pUT18C	empty	113.9	105.4	100.1			106.467	6.96156
pKT25	RneE_scaff_D	pUT18	empty	107.5	101.7	102.6			103.933	3.12143
pUT18C	RneE_scaff_D	pKT25	empty	94.7	106.2	94.3			98.4	6.75796
pUT18C	RneE_scaff_D	pN-25	empty	88	94.7	100.5			94.4	6.2554
pKT25	RneE_scaff_D	pUT18C	Dip_phiKZ	87.3	91.5	86.4			88.4	2.72213	0.0163908	0.317988
pKT25	RneE_scaff_D	pUT18	Dip_phiKZ	89.7	105.5	99			98.0667	7.94124	0.165444	0.0435435
pUT18C	RneE_scaff_D	pKT25	Dip_phiKZ	89.5	100.8	100.4			96.9	6.41171	0.397093	0.0625077
pUT18C	RneE_scaff_D	pN-25	Dip_phiKZ	103.9	107.2	115.1			108.733	5.75529	0.0217903	0.0549996
Fragment E
pKT25	RneE_scaff_E	pUT18C	empty	109.5	121.1	110.1			113.567	6.53095
pKT25	RneE_scaff_E	pUT18	empty	136.6	118.5	115.2			123.433	11.5214
pUT18C	RneE_scaff_E	pKT25	empty	111.1	103.3	100.1			104.833	5.65803
pUT18C	RneE_scaff_E	pN-25	empty	111.7	103.7	99			104.8	6.42106
pKT25	RneE_scaff_E	pUT18C	Dip_phiKZ	94.9	86.7	90.8			90.8	4.1	0.00543655	0.207188
pKT25	RneE_scaff_E	pUT18	Dip_phiKZ	108.3	111	107.8			109.033	1.72143	0.0800656	0.0343199
pUT18C	RneE_scaff_E	pKT25	Dip_phiKZ	104.7	91.8	111.7			102.733	10.0947	0.386498	0.124039
pUT18C	RneE_scaff_E	pN-25	Dip_phiKZ	98	95.4	101.7			98.3667	3.16596	0.109979	0.183109
Fragment F
pKT25	RneE_scaff_F	pUT18C	empty	100.1	92.9	104.2			99.0667	5.72043
pKT25	RneE_scaff_F	pUT18	empty	103.2	109.4	119.9			110.833	8.44176
pUT18C	RneE_scaff_F	pKT25	empty	88	107.7	100.3			98.6667	9.95105
pUT18C	RneE_scaff_F	pN-25	empty	102.2	82.8	102.2			95.7333	11.2006
pKT25	RneE_scaff_F	pUT18C	Dip_phiKZ	3042.3	2260.1	4418.2			3240.2	1092.58	0.0190193	0.0188648
pKT25	RneE_scaff_F	pUT18	Dip_phiKZ	2358.7	1170.5	1537.2			1688.8	608.434	0.0230646	0.0211483
pUT18C	RneE_scaff_F	pKT25	Dip_phiKZ	4489.9	3732.3	2519.4			3580.53	993.978	0.0130479	0.0131734
pUT18C	RneE_scaff_F	pN-25	Dip_phiKZ	4856.8	3791.4	4866.4			4504.87	617.899	0.00323453	0.00322346
Fragment G
pKT25	RneE_scaff_G	pUT18C	empty	116.2	124.6	116.4			119.067	4.79305
pKT25	RneE_scaff_G	pUT18	empty	111.5	141.1	114.7			122.433	16.2448
pUT18C	RneE_scaff_G	pKT25	empty	116	106.3	101.7			108	7.3
pUT18C	RneE_scaff_G	pN-25	empty	105	109.6	111.2			108.6	3.2187
pKT25	RneE_scaff_G	pUT18C	Dip_phiKZ	110.6	117.1	115.6			114.433	3.40343	0.125555	0.0084315
pKT25	RneE_scaff_G	pUT18	Dip_phiKZ	110.2	105.1	97.7			104.333	6.28517	0.0921182	0.0367906
pUT18C	RneE_scaff_G	pKT25	Dip_phiKZ	123.3	112.5	119.4			118.4	5.469	0.0625375	0.431133
pUT18C	RneE_scaff_G	pN-25	Dip_phiKZ	120.9	127.9	121.3			123.367	3.93107	0.00404137	0.0183169
Fragment H
pKT25	RneE_scaff_H	pUT18C	empty	122.2	120.3	118.2			120.233	2.00083
pKT25	RneE_scaff_H	pUT18	empty	118.5	116.4	113.4			116.1	2.5632
pUT18C	RneE_scaff_H	pKT25	empty	121.8	126.3	130.7			126.267	4.45009
pUT18C	RneE_scaff_H	pN-25	empty	118.4	125	120			121.133	3.44287
pKT25	RneE_scaff_H	pUT18C	gp37_phiKZ	132	124.5	130.8			129.1	4.02865	0.0217772	0.0023984
pKT25	RneE_scaff_H	pUT18	gp37_phiKZ	111	112.3	116.9			113.4	3.1	0.155865	0.0301384
pUT18C	RneE_scaff_H	pKT25	gp37_phiKZ	121.8	119.2	118.8			119.933	1.62891	0.0599655	0.367555
pUT18C	RneE_scaff_H	pN-25	gp37_phiKZ	125.5	119.2	127.8			124.167	4.45234	0.203257	0.0164816
Fragment I
pKT25	RneE_scaff_I	pUT18C	empty	109	92	126			109	17
pKT25	RneE_scaff_I	pUT18	empty	122	124	135			127	7
pUT18C	RneE_scaff_I	pKT25	empty	125	109	160			131.333	26.0832
pUT18C	RneE_scaff_I	pN-25	empty	135	144	120			133	12.1244	37
pKT25	RneE_scaff_I	pUT18C	Dip_phiKZ	7384.5	6962.4	5306.7			6551.2	1098.24	0.00476784	0.00473881
pKT25	RneE_scaff_I	pUT18	Dip_phiKZ	464.3	656.3	591			570.533	97.6226	0.0076937	0.00328675
pUT18C	RneE_scaff_I	pKT25	Dip_phiKZ	5966.8	6203.8	6113.1			6094.57	119.582	3.4424e-05	5.43383e-05
pUT18C	RneE_scaff_I	pN-25	Dip_phiKZ	4428.6	4005.4	4060.5			4164.83	230.084	0.000526997	0.000513799
Fragment J
pKT25	RneE_scaff_J	pUT18C	empty	118	107	118			114.333	6.35085
pKT25	RneE_scaff_J	pUT18	empty	108	113	120			113.667	6.02771
pUT18C	RneE_scaff_J	pKT25	empty	89	108	91			96	10.4403
pUT18C	RneE_scaff_J	pN-25	empty	123	138	121			127.333	9.29157
pKT25	RneE_scaff_J	pUT18C	Dip_phiKZ	118.8	118.4	123.5			120.233	2.83608	0.122689	0.00626206
pKT25	RneE_scaff_J	pUT18	Dip_phiKZ	122.9	117.2	121			120.367	2.9023	0.0925085	0.0253849
pUT18C	RneE_scaff_J	pKT25	Dip_phiKZ	131.1	125.4	113.6			123.367	8.92543	0.0135203	0.269615
pUT18C	RneE_scaff_J	pN-25	Dip_phiKZ	130.8	146.3	125			134.033	11.012	0.233461	0.00565885
