# Supplementary material for: Structural elucidation of a novel mechanism for the bacteriophage-based inhibition of the RNA degradosome
Source: eLife. 2016 Jul 22;5:e16413. doi: 10.7554/eLife.16413 (PMC4980113; doi:10.7554/eLife.16413)
Supplement: Figure 6—figure supplement 1—source data 1. — DOI: http://dx.doi.org/10.7554/eLife.16413.018 [file elife-16413-fig6-figsupp1-data1.xlsx]

## Sheet: Results bioscreen
	Blanco					Average		Dip - 0% arabinose (- blanco)						Dip - 0.1% arabinose (- blanco)						Dip - 1% arabinose (- blanco)
Time	0% ara	0.1% ara	1% ara	0% ara	1% ara	0.0760421		Replica 1	Replica 2	Replica 3	Average	Stdev		Replica 1	Replica 2	Replica 3	Average	Stdev		Replica 1	Replica 2	Replica 3	Average	Stdev
0	0.073	0.077	0.079	0.076	0.079	0.0768		0.134958	0.018958	0.034958	0.062958	0.0628649		0.016958	0.025958	0.015958	0.0196247	0.00550757		0.033958	0.045958	0.028958	0.0362913	0.00873689
0.1675	0.074	0.076	0.075	0.076	0.077	0.0756		0.032958	0.024958	0.039958	0.0326247	0.00750555		0.023958	0.022958	0.023958	0.0236247	0.00057735		0.016958	0.040958	0.026958	0.0282913	0.0120554
0.333889	0.074	0.077	0.076	0.076	0.079	0.0764		0.037958	0.027958	0.043958	0.0366247	0.0080829		0.021958	0.027958	0.023958	0.0246247	0.00305505		0.029958	0.040958	0.024958	0.031958	0.00818535
0.501944	0.075	0.078	0.078	0.077	0.079	0.0774		0.045958	0.031958	0.050958	0.042958	0.00984886		0.024958	0.031958	0.025958	0.0276247	0.00378594		0.029958	0.041958	0.025958	0.0326247	0.00832666
0.6675	0.076	0.078	0.078	0.077	0.078	0.0774		0.054958	0.036958	0.057958	0.049958	0.0113578		0.028958	0.035958	0.027958	0.030958	0.0043589		0.031958	0.043958	0.027958	0.0346247	0.00832666
0.833889	0.075	0.077	0.079	0.076	0.078	0.077		0.064958	0.042958	0.069958	0.0592913	0.0143643		0.033958	0.041958	0.033958	0.0366247	0.0046188		0.036958	0.050958	0.033958	0.0406247	0.00907377
1.00083	0.075	0.077	0.079	0.077	0.08	0.0776		0.072958	0.050958	0.080958	0.0682913	0.0155349		0.039958	0.046958	0.036958	0.0412913	0.0051316		0.042958	0.058958	0.037958	0.0466247	0.0109697
1.16722	0.075	0.078	0.078	0.076	0.08	0.0774		0.082958	0.058958	0.090958	0.0776247	0.0166533		0.047958	0.054958	0.042958	0.0486247	0.00602771		0.049958	0.064958	0.044958	0.0532913	0.0104083
1.33389	0.074	0.075	0.077	0.076	0.079	0.0762		0.090958	0.065958	0.098958	0.0852913	0.0172143		0.054958	0.061958	0.047958	0.054958	0.007		0.056958	0.071958	0.049958	0.0596247	0.0112398
1.50083	0.076	0.077	0.078	0.076	0.079	0.0772		0.101958	0.073958	0.110958	0.0956247	0.0192959		0.062958	0.069958	0.057958	0.0636247	0.00602771		0.064958	0.079958	0.057958	0.0676247	0.0112398
1.6675	0.075	0.077	0.078	0.077	0.079	0.0772		0.109958	0.082958	0.120958	0.104625	0.0195533		0.068958	0.078958	0.063958	0.0706247	0.00763763		0.070958	0.087958	0.063958	0.0742913	0.0123423
1.83389	0.075	0.077	0.077	0.077	0.077	0.0766		0.119958	0.089958	0.127958	0.112625	0.0200333		0.077958	0.086958	0.069958	0.0782913	0.0085049		0.078958	0.094958	0.068958	0.080958	0.0131149
2.00083	0.075	0.077	0.077	0.076	0.077	0.0764		0.131958	0.095958	0.138958	0.122291	0.0230723		0.087958	0.093958	0.078958	0.086958	0.00754983		0.086958	0.100958	0.075958	0.087958	0.01253
2.16778	0.075	0.076	0.077	0.077	0.079	0.0768		0.139958	0.103958	0.147958	0.130625	0.0234379		0.095958	0.101958	0.086958	0.094958	0.00754983		0.092958	0.108958	0.083958	0.0952913	0.0126623
2.33389	0.074	0.076	0.075	0.076	0.077	0.0756		0.149958	0.110958	0.156958	0.139291	0.0247857		0.104958	0.110958	0.095958	0.103958	0.00754983		0.100958	0.116958	0.090958	0.102958	0.0131149
2.50056	0.074	0.077	0.078	0.077	0.078	0.0768		0.156958	0.120958	0.162958	0.146958	0.0227156		0.110958	0.118958	0.103958	0.111291	0.00750555		0.107958	0.124958	0.098958	0.110625	0.0132035
2.66722	0.075	0.076	0.076	0.076	0.077	0.076		0.164958	0.126958	0.171958	0.154625	0.0242143		0.117958	0.126958	0.112958	0.119291	0.0070946		0.113958	0.131958	0.105958	0.117291	0.0133167
2.83417	0.074	0.077	0.076	0.077	0.079	0.0766		0.175958	0.136958	0.177958	0.163625	0.0231157		0.128958	0.136958	0.121958	0.129291	0.00750555		0.123958	0.140958	0.112958	0.125958	0.0141067
3.00083	0.074	0.077	0.074	0.077	0.077	0.0758		0.183958	0.143958	0.188958	0.172291	0.0246644		0.136958	0.144958	0.132958	0.138291	0.0061101		0.130958	0.146958	0.123958	0.133958	0.0117898
3.1675	0.074	0.077	0.073	0.076	0.077	0.0754		0.192958	0.152958	0.192958	0.179625	0.023094		0.147958	0.153958	0.139958	0.147291	0.00702377		0.140958	0.155958	0.128958	0.141958	0.0135277
3.33389	0.074	0.076	0.074	0.077	0.076	0.0754		0.197958	0.161958	0.202958	0.187625	0.0223681		0.153958	0.161958	0.149958	0.155291	0.0061101		0.145958	0.163958	0.137958	0.149291	0.0133167
3.50306	0.075	0.077	0.075	0.076	0.077	0.076		0.211958	0.173958	0.217958	0.201291	0.0238607		0.164958	0.171958	0.158958	0.165291	0.00650641		0.156958	0.173958	0.145958	0.158958	0.0141067
3.66778	0.075	0.077	0.074	0.077	0.077	0.076		0.221958	0.183958	0.228958	0.211625	0.0242143		0.173958	0.179958	0.167958	0.173958	0.006		0.164958	0.180958	0.154958	0.166958	0.0131149
3.83389	0.075	0.077	0.074	0.076	0.076	0.0756		0.228958	0.190958	0.234958	0.218291	0.0238607		0.179958	0.186958	0.173958	0.180291	0.00650641		0.170958	0.187958	0.160958	0.173291	0.0136504
4.00083	0.074	0.077	0.072	0.076	0.075	0.0748		0.238958	0.199958	0.243958	0.227625	0.0240901		0.188958	0.194958	0.181958	0.188625	0.00650641		0.180958	0.193958	0.168958	0.181291	0.0125033
4.16722	0.075	0.076	0.075	0.077	0.076	0.0758		0.245958	0.206958	0.254958	0.235958	0.0255147		0.196958	0.202958	0.186958	0.195625	0.0080829		0.186958	0.202958	0.178958	0.189625	0.0122202
4.33528	0.075	0.077	0.074	0.077	0.076	0.0758		0.253958	0.214958	0.269958	0.246291	0.0282902		0.203958	0.213958	0.196958	0.204958	0.008544		0.196958	0.211958	0.187958	0.198958	0.0121244
4.50056	0.075	0.077	0.074	0.077	0.077	0.076		0.260958	0.221958	0.272958	0.251958	0.0266646		0.209958	0.217958	0.197958	0.208625	0.0100664		0.202958	0.217958	0.191958	0.204291	0.0130512
4.66722	0.075	0.077	0.074	0.077	0.076	0.0758		0.276958	0.234958	0.281958	0.264625	0.0258134		0.222958	0.229958	0.211958	0.221625	0.00907377		0.213958	0.226958	0.201958	0.214291	0.0125033
4.83417	0.075	0.076	0.074	0.077	0.075	0.0754		0.281958	0.243958	0.291958	0.272625	0.0253246		0.225958	0.237958	0.218958	0.227625	0.00960902		0.217958	0.233958	0.208958	0.220291	0.0126623
5.00083	0.075	0.077	0.075	0.077	0.077	0.0762		0.295958	0.255958	0.299958	0.283958	0.0243311		0.235958	0.244958	0.226958	0.235958	0.009		0.227958	0.241958	0.215958	0.228625	0.0130128
5.16778	0.074	0.076	0.073	0.077	0.075	0.075		0.306958	0.266958	0.310958	0.294958	0.0243311		0.243958	0.252958	0.237958	0.244958	0.00754983		0.235958	0.249958	0.224958	0.236958	0.01253
5.33389	0.075	0.076	0.074	0.077	0.077	0.0758		0.316958	0.279958	0.318958	0.305291	0.0219621		0.248958	0.262958	0.246958	0.252958	0.0087178		0.239958	0.257958	0.229958	0.242625	0.0141892
5.50056	0.074	0.077	0.074	0.076	0.075	0.0752		0.326958	0.292958	0.331958	0.317291	0.0212211		0.257958	0.269958	0.255958	0.261291	0.00757188		0.248958	0.265958	0.239958	0.251625	0.0132035
5.66722	0.075	0.076	0.074	0.077	0.076	0.0756		0.339958	0.306958	0.340958	0.329291	0.0193477		0.265958	0.277958	0.264958	0.269625	0.00723418		0.255958	0.272958	0.245958	0.258291	0.0136504
5.83556	0.074	0.077	0.073	0.077	0.075	0.0752		0.354958	0.320958	0.354958	0.343625	0.0196299		0.276958	0.288958	0.277958	0.281291	0.00665833		0.265958	0.280958	0.253958	0.266958	0.0135277
6.00083	0.075	0.076	0.074	0.077	0.079	0.0762		0.364958	0.335958	0.363958	0.354958	0.0164621		0.281958	0.295958	0.281958	0.286625	0.0080829		0.271958	0.287958	0.260958	0.273625	0.0135769
6.1675	0.075	0.077	0.073	0.076	0.077	0.0756		0.378958	0.350958	0.377958	0.369291	0.015885		0.291958	0.304958	0.289958	0.295625	0.00814453		0.280958	0.294958	0.267958	0.281291	0.0135031
6.33417	0.075	0.076	0.074	0.077	0.076	0.0756		0.390958	0.364958	0.389958	0.381958	0.0147309		0.299958	0.313958	0.297958	0.303958	0.0087178		0.286958	0.302958	0.273958	0.287958	0.0145258
6.50083	0.074	0.076	0.074	0.076	0.077	0.0754		0.401958	0.378958	0.400958	0.393958	0.013		0.306958	0.322958	0.304958	0.311625	0.00986577		0.292958	0.309958	0.280958	0.294625	0.0145717
6.66778	0.074	0.076	0.075	0.076	0.076	0.0754		0.414958	0.392958	0.416958	0.408291	0.0133167		0.317958	0.331958	0.311958	0.320625	0.0102632		0.301958	0.316958	0.288958	0.302625	0.0140119
6.83389	0.074	0.076	0.074	0.077	0.078	0.0758		0.431958	0.409958	0.426958	0.422958	0.0115326		0.326958	0.341958	0.321958	0.330291	0.0104083		0.309958	0.325958	0.296958	0.310958	0.0145258
7.00056	0.075	0.076	0.075	0.077	0.078	0.0762		0.442958	0.424958	0.437958	0.435291	0.00929157		0.332958	0.351958	0.328958	0.337958	0.0122882		0.317958	0.332958	0.302958	0.317958	0.015
7.16722	0.075	0.076	0.074	0.077	0.076	0.0756		0.453958	0.439958	0.447958	0.447291	0.00702377		0.340958	0.359958	0.334958	0.345291	0.0130512		0.324958	0.340958	0.310958	0.325625	0.0150111
7.33417	0.074	0.076	0.073	0.076	0.077	0.0752		0.467958	0.454958	0.462958	0.461958	0.00655744		0.349958	0.367958	0.344958	0.354291	0.0120968		0.333958	0.348958	0.321958	0.334958	0.0135277
7.50056	0.075	0.076	0.074	0.077	0.077	0.0758		0.477958	0.467958	0.474958	0.473625	0.0051316		0.358958	0.377958	0.354958	0.363958	0.0122882		0.341958	0.356958	0.327958	0.342291	0.0145029
7.6675	0.074	0.076	0.074	0.077	0.078	0.0758		0.487958	0.479958	0.481958	0.483291	0.00416333		0.366958	0.386958	0.360958	0.371625	0.0136137		0.349958	0.364958	0.332958	0.349291	0.0160104
7.83583	0.075	0.076	0.074	0.077	0.076	0.0756		0.504958	0.496958	0.493958	0.498625	0.00568624		0.373958	0.395958	0.370958	0.380291	0.0136504		0.357958	0.372958	0.344958	0.358625	0.0140119
8.00111	0.075	0.076	0.074	0.077	0.077	0.0758		0.512958	0.506958	0.500958	0.506958	0.006		0.382958	0.404958	0.375958	0.387958	0.0151327		0.365958	0.380958	0.350958	0.365958	0.015
8.1675	0.075	0.076	0.073	0.077	0.077	0.0756		0.516958	0.514958	0.512958	0.514958	0.002		0.388958	0.412958	0.388958	0.396958	0.0138564		0.373958	0.389958	0.359958	0.374625	0.0150111
8.33389	0.075	0.077	0.074	0.077	0.076	0.0758		0.526958	0.523958	0.520958	0.523958	0.003		0.398958	0.421958	0.395958	0.405625	0.0142244		0.383958	0.396958	0.367958	0.382958	0.0145258
8.50056	0.074	0.076	0.074	0.077	0.077	0.0756		0.536958	0.534958	0.530958	0.534291	0.00305505		0.407958	0.430958	0.401958	0.413625	0.015308		0.390958	0.405958	0.375958	0.390958	0.015
8.66722	0.075	0.076	0.077	0.077	0.078	0.0766		0.544958	0.544958	0.536958	0.542291	0.0046188		0.414958	0.439958	0.409958	0.421625	0.0160728		0.400958	0.414958	0.382958	0.399625	0.0160416
8.83417	0.074	0.076	0.075	0.077	0.076	0.0756		0.553958	0.554958	0.549958	0.552958	0.00264575		0.423958	0.447958	0.421958	0.431291	0.0144684		0.407958	0.422958	0.390958	0.407291	0.0160104
9.00056	0.075	0.076	0.075	0.077	0.076	0.0758		0.563958	0.564958	0.558958	0.562625	0.00321455		0.431958	0.456958	0.429958	0.439625	0.0150444		0.416958	0.431958	0.400958	0.416625	0.0155027
9.16722	0.075	0.076	0.074	0.077	0.076	0.0756		0.571958	0.575958	0.566958	0.571625	0.00450925		0.440958	0.465958	0.438958	0.448625	0.0150444		0.426958	0.440958	0.409958	0.425958	0.0155242
9.33417	0.075	0.076	0.074	0.077	0.077	0.0758		0.580958	0.585958	0.575958	0.580958	0.005		0.448958	0.474958	0.447958	0.457291	0.015308		0.436958	0.450958	0.417958	0.435291	0.016563
9.50306	0.075	0.076	0.076	0.077	0.077	0.0762		0.594958	0.600958	0.584958	0.593625	0.0080829		0.456958	0.484958	0.455958	0.465958	0.0164621		0.443958	0.458958	0.427958	0.443625	0.0155027
9.66778	0.075	0.076	0.074	0.077	0.077	0.0758		0.596958	0.603958	0.588958	0.596625	0.00750555		0.465958	0.492958	0.463958	0.474291	0.0161967		0.456958	0.465958	0.436958	0.453291	0.0148436
9.83389	0.075	0.076	0.075	0.077	0.077	0.076		0.604958	0.614958	0.599958	0.606625	0.00763763		0.473958	0.500958	0.473958	0.482958	0.0155885		0.470958	0.477958	0.445958	0.464958	0.0168226
10.0006	0.075	0.076	0.075	0.078	0.076	0.076		0.615958	0.624958	0.606958	0.615958	0.009		0.482958	0.509958	0.479958	0.490958	0.0165227		0.486958	0.486958	0.454958	0.476291	0.0184752
10.1672	0.076	0.077	0.074	0.077	0.077	0.0762		0.622958	0.632958	0.614958	0.623625	0.0090185		0.490958	0.517958	0.487958	0.498958	0.0165227		0.497958	0.496958	0.467958	0.487625	0.0170392
10.3356	0.075	0.077	0.076	0.077	0.077	0.0764		0.637958	0.647958	0.623958	0.636625	0.0120554		0.498958	0.528958	0.493958	0.507291	0.0189297		0.506958	0.506958	0.479958	0.497958	0.0155885
10.5006	0.075	0.076	0.075	0.077	0.076	0.0758		0.638958	0.649958	0.629958	0.639625	0.0100167		0.504958	0.531958	0.499958	0.512291	0.0172143		0.532958	0.514958	0.497958	0.515291	0.0175024
10.6675	0.075	0.077	0.075	0.077	0.077	0.0762		0.647958	0.661958	0.638958	0.649625	0.0115902		0.515958	0.542958	0.511958	0.523625	0.0168622		0.537958	0.525958	0.485958	0.516625	0.0272274
10.8342	0.075	0.076	0.075	0.077	0.076	0.0758		0.656958	0.671958	0.645958	0.658291	0.0130512		0.521958	0.549958	0.519958	0.530625	0.016773		0.573958	0.536958	0.458958	0.523291	0.0587055
11.0031	0.075	0.076	0.074	0.077	0.077	0.0758		0.669958	0.686958	0.652958	0.669958	0.017		0.529958	0.559958	0.524958	0.538291	0.0189297		0.497958	0.544958	0.463958	0.502291	0.0406735
11.1678	0.075	0.076	0.074	0.078	0.077	0.076		0.672958	0.692958	0.660958	0.675625	0.0161658		0.535958	0.563958	0.535958	0.545291	0.0161658		0.510958	0.552958	0.514958	0.526291	0.0231805
11.3339	0.075	0.076	0.076	0.078	0.077	0.0764		0.683958	0.705958	0.669958	0.686625	0.0181475		0.543958	0.572958	0.539958	0.552291	0.0180093		0.528958	0.567958	0.511958	0.536291	0.0287112
11.5006	0.075	0.076	0.076	0.078	0.076	0.0762		0.691958	0.717958	0.675958	0.695291	0.0211975		0.551958	0.579958	0.548958	0.560291	0.0170978		0.530958	0.579958	0.540958	0.550625	0.0258908
11.6672	0.074	0.076	0.074	0.077	0.077	0.0756		0.700958	0.723958	0.682958	0.702625	0.0205508		0.555958	0.585958	0.554958	0.565625	0.0176163		0.548958	0.596958	0.653958	0.599958	0.0525642
11.8342	0.075	0.076	0.075	0.077	0.077	0.076		0.709958	0.741958	0.690958	0.714291	0.0257747		0.564958	0.594958	0.562958	0.574291	0.0179258		0.544958	0.611958	0.639958	0.598958	0.048816
12.0006	0.074	0.076	0.077	0.077	0.077	0.0762		0.717958	0.751958	0.699958	0.723291	0.0264071		0.571958	0.599958	0.568958	0.580291	0.0170978		0.657958	0.614958	0.537958	0.603625	0.0607975
12.1675	0.074	0.076	0.075	0.077	0.077	0.0758		0.730958	0.758958	0.708958	0.732958	0.0250599		0.578958	0.605958	0.575958	0.586958	0.0165227		0.577958	0.673958	0.550958	0.600958	0.0646452
12.3339	0.074	0.076	0.075	0.077	0.078	0.076		0.737958	0.767958	0.716958	0.740958	0.025632		0.585958	0.611958	0.584958	0.594291	0.015308		0.581958	0.693958	0.604958	0.626958	0.0591523
12.5008	0.075	0.076	0.075	0.077	0.075	0.0756		0.748958	0.780958	0.724958	0.751625	0.0280951		0.593958	0.619958	0.588958	0.600958	0.0166433		0.659958	0.641958	0.584958	0.628958	0.0391535
12.6675	0.075	0.076	0.074	0.077	0.078	0.076		0.759958	0.793958	0.732958	0.762291	0.0305669		0.600958	0.625958	0.593958	0.606958	0.0168226		0.628958	0.693958	0.544958	0.622625	0.0747016
12.8339	0.075	0.076	0.076	0.077	0.077	0.0762		0.768958	0.802958	0.742958	0.771625	0.0300888		0.604958	0.631958	0.599958	0.612291	0.0172143		0.642958	0.667958	0.598958	0.636625	0.0349333
13.0008	0.075	0.076	0.075	0.077	0.078	0.0762		0.780958	0.807958	0.754958	0.781291	0.0265016		0.613958	0.637958	0.606958	0.619625	0.0162583		0.636958	0.655958	0.580958	0.624625	0.0389915
13.1672	0.075	0.076	0.075	0.077	0.077	0.076		0.789958	0.821958	0.760958	0.790958	0.0305123		0.618958	0.643958	0.612958	0.625291	0.0164418		0.647958	0.783958	0.587958	0.673291	0.100426
13.3339	0.075	0.076	0.075	0.077	0.077	0.076		0.797958	0.832958	0.771958	0.800958	0.0306105		0.625958	0.649958	0.620958	0.632291	0.0155027		0.646958	0.650958	0.610958	0.636291	0.0220303
13.5006	0.075	0.076	0.075	0.077	0.076	0.0758		0.806958	0.850958	0.779958	0.812625	0.0358376		0.629958	0.655958	0.625958	0.637291	0.0162891		0.643958	0.678958	0.696958	0.673291	0.0269506
13.6672	0.075	0.077	0.076	0.077	0.078	0.0766		0.818958	0.856958	0.786958	0.820958	0.0350428		0.636958	0.663958	0.631958	0.644291	0.0172143		0.652958	0.717958	0.603958	0.658291	0.0571868
13.8339	0.075	0.076	0.076	0.077	0.076	0.076		0.828958	0.856958	0.797958	0.827958	0.0295127		0.643958	0.669958	0.637958	0.650625	0.0170098		0.654958	0.681958	0.613958	0.650291	0.0342394
14.0008	0.075	0.076	0.076	0.077	0.077	0.0762		0.838958	0.856958	0.806958	0.834291	0.0253246		0.649958	0.676958	0.644958	0.657291	0.0172143		0.665958	0.724958	0.650958	0.680625	0.0391195
14.1675	0.074	0.076	0.075	0.077	0.076	0.0756		0.851958	0.852958	0.811958	0.838958	0.023388		0.656958	0.674958	0.649958	0.660625	0.012897		0.666958	0.743958	0.638958	0.683291	0.0543722
14.3339	0.075	0.076	0.076	0.077	0.076	0.076		0.860958	0.850958	0.822958	0.844958	0.0196977		0.661958	0.685958	0.655958	0.667958	0.0158745		0.671958	0.771958	0.647958	0.697291	0.0657673
14.5008	0.074	0.076	0.075	0.077	0.076	0.0756		0.861958	0.845958	0.830958	0.846291	0.0155027		0.668958	0.688958	0.662958	0.673625	0.0136137		0.674958	0.808958	0.636958	0.706958	0.0903549
14.6672	0.075	0.076	0.076	0.077	0.077	0.0762		0.860958	0.840958	0.837958	0.846625	0.0125033		0.673958	0.690958	0.667958	0.677625	0.0119304		0.678958	0.718958	0.648958	0.682291	0.0351188
14.8342	0.075	0.077	0.075	0.077	0.077	0.0762		0.859958	0.837958	0.851958	0.849958	0.0111355		0.678958	0.700958	0.672958	0.684291	0.0147422		0.685958	0.711958	0.646958	0.681625	0.0327159
15.0006	0.075	0.076	0.075	0.077	0.076	0.0758		0.855958	0.833958	0.861958	0.850625	0.0147422		0.685958	0.707958	0.678958	0.690958	0.0151327		0.694958	0.738958	0.663958	0.699291	0.0376873
15.1694	0.075	0.076	0.076	0.077	0.078	0.0764		0.852958	0.831958	0.860958	0.848625	0.0149778		0.690958	0.712958	0.682958	0.695625	0.0155349		0.697958	0.743958	0.660958	0.700958	0.0415812
15.3339	0.075	0.076	0.073	0.077	0.076	0.0754		0.849958	0.826958	0.859958	0.845625	0.0169214		0.696958	0.717958	0.688958	0.701291	0.0149778		0.702958	0.821958	0.663958	0.729625	0.0823063
15.5011	0.074	0.076	0.075	0.077	0.077	0.0758		0.844958	0.820958	0.857958	0.841291	0.0187705		0.704958	0.722958	0.695958	0.707958	0.0137477		0.714958	0.735958	0.672958	0.707958	0.032078
15.6675	0.075	0.076	0.076	0.077	0.078	0.0764		0.840958	0.813958	0.853958	0.836291	0.0204042		0.709958	0.724958	0.701958	0.712291	0.0116762		0.726958	0.739958	0.677958	0.714958	0.0326956
15.8339	0.074	0.077	0.077	0.077	0.077	0.0764		0.836958	0.805958	0.850958	0.831291	0.023029		0.714958	0.732958	0.706958	0.718291	0.0133167		0.723958	0.772958	0.679958	0.725625	0.0465224
16.0006	0.075	0.076	0.076	0.077	0.077	0.0762		0.831958	0.803958	0.843958	0.826625	0.0205264		0.722958	0.743958	0.712958	0.726625	0.0158219		0.735958	0.758958	0.683958	0.726291	0.0384231
16.1672	0.075	0.076	0.077	0.077	0.077	0.0764		0.827958	0.798958	0.839958	0.822291	0.0210792		0.726958	0.742958	0.718958	0.729625	0.0122202		0.724958	0.778958	0.694958	0.732958	0.0425676
16.3342	0.074	0.076	0.076	0.077	0.077	0.076		0.823958	0.797958	0.837958	0.819958	0.0202978		0.731958	0.746958	0.724958	0.734625	0.0112398		0.726958	0.783958	0.691958	0.734291	0.0464363
16.5006	0.075	0.076	0.076	0.077	0.077	0.0762		0.820958	0.796958	0.831958	0.816625	0.0178979		0.738958	0.753958	0.729958	0.740958	0.0121244		0.737958	0.764958	0.694958	0.732625	0.0353034
16.6675	0.074	0.076	0.076	0.077	0.078	0.0762		0.816958	0.793958	0.828958	0.813291	0.0177858		0.745958	0.758958	0.735958	0.746958	0.0115326		0.732958	0.780958	0.699958	0.737958	0.0407308
16.8342	0.074	0.076	0.076	0.077	0.078	0.0762		0.811958	0.787958	0.824958	0.808291	0.0187705		0.750958	0.767958	0.740958	0.753291	0.0136504		0.724958	0.776958	0.703958	0.735291	0.037581
17.0008	0.075	0.076	0.076	0.077	0.078	0.0764		0.808958	0.784958	0.820958	0.804958	0.0183303		0.759958	0.766958	0.746958	0.757958	0.0101489		0.732958	0.779958	0.701958	0.738291	0.0392726
17.1675	0.075	0.076	0.075	0.077	0.079	0.0764		0.805958	0.782958	0.816958	0.801958	0.0173494		0.764958	0.772958	0.750958	0.762958	0.0111355		0.734958	0.777958	0.703958	0.738958	0.0371618
17.3339	0.075	0.076	0.075	0.077	0.076	0.0758		0.802958	0.779958	0.812958	0.798625	0.0169214		0.766958	0.780958	0.756958	0.768291	0.0120554		0.739958	0.776958	0.710958	0.742625	0.0330807
17.5006	0.075	0.076	0.076	0.077	0.076	0.076		0.800958	0.776958	0.810958	0.796291	0.0174738		0.778958	0.786958	0.762958	0.776291	0.0122202		0.745958	0.794958	0.715958	0.752291	0.039879
17.6672	0.074	0.076	0.076	0.077	0.078	0.0762		0.794958	0.777958	0.805958	0.792958	0.0141067		0.778958	0.786958	0.767958	0.777958	0.00953939		0.749958	0.786958	0.719958	0.752291	0.0335609
17.8356	0.075	0.076	0.074	0.076	0.078	0.0758		0.790958	0.771958	0.800958	0.787958	0.0147309		0.783958	0.793958	0.771958	0.783291	0.0110151		0.752958	0.786958	0.712958	0.750958	0.0370405
18.0006	0.074	0.076	0.075	0.077	0.079	0.0762		0.788958	0.772958	0.800958	0.787625	0.0140475		0.791958	0.800958	0.774958	0.789291	0.0132035		0.756958	0.787958	0.716958	0.753958	0.0355949
18.1697	0.075	0.076	0.075	0.077	0.076	0.0758		0.785958	0.771958	0.797958	0.785291	0.0130128		0.791958	0.800958	0.779958	0.790958	0.0105357		0.757958	0.791958	0.722958	0.757625	0.0345012
18.3339	0.074	0.077	0.075	0.077	0.078	0.0762		0.782958	0.766958	0.796958	0.782291	0.0150111		0.800958	0.806958	0.786958	0.798291	0.0102632		0.761958	0.807958	0.723958	0.764625	0.0420634
18.5008	0.074	0.077	0.077	0.077	0.078	0.0766		0.779958	0.765958	0.787958	0.777958	0.0111355		0.805958	0.813958	0.791958	0.803958	0.0111355		0.768958	0.805958	0.725958	0.766958	0.0400375
18.6678	0.074	0.076	0.074	0.077	0.077	0.0756		0.778958	0.765958	0.786958	0.777291	0.0105987		0.824958	0.813958	0.795958	0.811625	0.0146401		0.771958	0.800958	0.727958	0.766958	0.036756
18.8339	0.074	0.077	0.075	0.077	0.077	0.076		0.777958	0.764958	0.787958	0.776958	0.0115326		0.811958	0.819958	0.799958	0.810625	0.0100664		0.772958	0.801958	0.729958	0.768291	0.0362261
19.0008	0.074	0.076	0.075	0.077	0.078	0.076		0.778958	0.759958	0.783958	0.774291	0.0126623		0.822958	0.821958	0.803958	0.816291	0.0106927		0.772958	0.794958	0.733958	0.767291	0.0308923
19.1675	0.075	0.077	0.078	0.077	0.078	0.077		0.773958	0.758958	0.780958	0.771291	0.0112398		0.824958	0.828958	0.812958	0.822291	0.00832666		0.775958	0.796958	0.740958	0.771291	0.0282902
19.3339	0.074	0.075	0.074	0.076	0.076	0.075		0.771958	0.755958	0.777958	0.768625	0.0113725		0.833958	0.832958	0.812958	0.826625	0.0118462		0.773958	0.802958	0.738958	0.771958	0.0320468
19.5006	0.074	0.074	0.074	0.077	0.078	0.0754		0.772958	0.756958	0.774958	0.768291	0.00986577		0.823958	0.834958	0.816958	0.825291	0.00907377		0.779958	0.800958	0.743958	0.774958	0.0288271
19.6672	0.074	0.076	0.076	0.077	0.079	0.0764		0.770958	0.752958	0.773958	0.765958	0.0113578		0.821958	0.846958	0.821958	0.830291	0.0144338		0.783958	0.802958	0.744958	0.777291	0.0295691
19.8361	0.075	0.076	0.076	0.077	0.078	0.0764		0.768958	0.757958	0.772958	0.766625	0.00776745		0.811958	0.844958	0.827958	0.828291	0.0165025		0.790958	0.806958	0.744958	0.780958	0.032187
20.0011	0.074	0.076	0.075	0.077	0.077	0.0758		0.765958	0.751958	0.767958	0.761958	0.0087178		0.815958	0.846958	0.831958	0.831625	0.0155027		0.776958	0.822958	0.748958	0.782958	0.0373631
20.1678	0.075	0.076	0.076	0.077	0.078	0.0764		0.764958	0.751958	0.766958	0.761291	0.00814453		0.821958	0.853958	0.833958	0.836625	0.0161658		0.784958	0.811958	0.752958	0.783291	0.0295353
20.3339	0.074	0.076	0.075	0.077	0.077	0.0758		0.763958	0.746958	0.766958	0.759291	0.0107858		0.818958	0.859958	0.850958	0.843291	0.0215484		0.790958	0.815958	0.752958	0.786625	0.0317228
20.5008	0.075	0.076	0.075	0.077	0.078	0.0762		0.762958	0.745958	0.763958	0.757625	0.010116		0.826958	0.879958	0.821958	0.842958	0.0321403		0.790958	0.826958	0.753958	0.790625	0.0365011
20.6672	0.075	0.076	0.076	0.077	0.079	0.0766		0.760958	0.746958	0.762958	0.756958	0.0087178		0.882958	0.849958	0.832958	0.855291	0.0254231		0.797958	0.814958	0.761958	0.791625	0.0270617
20.8342	0.075	0.076	0.077	0.077	0.077	0.0764		0.758958	0.742958	0.764958	0.755625	0.0113725		0.927958	0.853958	0.862958	0.881625	0.0403774		0.792958	0.811958	0.761958	0.788958	0.0252389
21.0006	0.074	0.076	0.075	0.077	0.078	0.076		0.757958	0.739958	0.760958	0.752958	0.0113578		0.837958	0.856958	0.848958	0.847958	0.00953939		0.799958	0.835958	0.764958	0.800291	0.0355012
21.1672	0.074	0.075	0.075	0.076	0.079	0.0758		0.755958	0.741958	0.758958	0.752291	0.00907377		0.842958	0.874958	0.845958	0.854625	0.017673		0.803958	0.823958	0.766958	0.798291	0.0289194
21.3339	0.074	0.076	0.074	0.077	0.078	0.0758		0.755958	0.739958	0.756958	0.750958	0.00953939		0.847958	0.879958	0.845958	0.857958	0.0190788		0.804958	0.822958	0.763958	0.797291	0.0302379
21.5008	0.075	0.076	0.077	0.077	0.077	0.0764		0.751958	0.738958	0.746958	0.745958	0.00655744		0.852958	0.880958	0.863958	0.865958	0.0141067		0.810958	0.832958	0.768958	0.804291	0.0325167
21.6689	0.075	0.077	0.074	0.078	0.078	0.0764		0.751958	0.736958	0.755958	0.748291	0.0100167		0.851958	0.881958	0.874958	0.869625	0.015695		0.807958	0.833958	0.769958	0.803958	0.032187
21.8339	0.074	0.076	0.077	0.077	0.08	0.0768		0.751958	0.735958	0.754958	0.747625	0.0102144		0.852958	0.884958	0.872958	0.870291	0.0161658		0.810958	0.843958	0.775958	0.810291	0.0340049
22.0008	0.074	0.076	0.074	0.077	0.078	0.0758		0.747958	0.730958	0.755958	0.744958	0.0127671		0.846958	0.877958	0.873958	0.866291	0.0168622		0.819958	0.841958	0.775958	0.812625	0.0336056
