# Supplementary material for: Structural elucidation of a novel mechanism for the bacteriophage-based inhibition of the RNA degradosome
Source: eLife. 2016 Jul 22;5:e16413. doi: 10.7554/eLife.16413 (PMC4980113; doi:10.7554/eLife.16413)
Supplement: Figure 6—source data 1. — DOI: http://dx.doi.org/10.7554/eLife.16413.015 [file elife-16413-fig6-data1.xlsx]

## Sheet: Results Western blot
Time point	Recplica 1				Replica 2				Replica 3				Average
	Count	Total aera	Area size	Normalised area	Count	Total aera	Area size	Normalised area	Count	Total aera	Area size	Normalised area	Normalised area	Stdev
0	0	0	0	0	0	0	0	0	0	0	0	0	0	0
3	0	0	0	0	0	0	0	0	0	0	0	0	0	0
6	0	0	0	0	0	0	0	0	0	0	0	0	0	0
9	0	0	0	0	0	0	0	0	0	0	0	0	0.036406	0.0514859
12	4	504	255	0.0908763	1	156	255	0.0275521	1	1286	255	0.271652	0.130027	0.103427
15	0	0	0	0	1	778	255	0.137407	1	2112	255	0.446134	0.291771	0.154364
18	1	5323	255	0.696718	1	2519	255	0.444896	1	2349	255	0.496198	0.545937	0.108656
21	1	8056	255	0.677966	1	3592	255	0.634405	2	3107	255	0.656316	0.656229	0.0177839
24	2	2226	255	0.795421	1	5796	255	0.748257	1	4060	255	0.704984	0.749554	0.0369323
27	1	226	255	0.176383	2	3407	255	0.43984	1	3414	255	0.592811	0.403011	0.171989
30	0	0	0	0.0421878	1	2001	255	0.258327	3	2524	255	0.438271	0.246262	0.161925
33	0	0	0	0.46025	1	4571	255	0.590111	4	3752	255	0.651502	0.567288	0.0797287
36	3	584	255	0.299979	1	4754	255	0.613736	4	3997	255	0.694044	0.53592	0.170026
39	4	1642	255	0.45177	1	4962	255	0.640589	2	3855	255	0.669387	0.587249	0.0965165
42	2	5869	255	0.634725	6	5655	255	0.730054	4	3830	255	0.665046	0.676609	0.0397673
45	2	8196	255	0.524698	1	5182	255	0.66899	2	2369	255	0.411356	0.535015	0.105431
Control	1	5546	255	1	1	5662	255	1	1	4734	255	1	1	0
