# Supplementary material for: Structural elucidation of a novel mechanism for the bacteriophage-based inhibition of the RNA degradosome
Source: eLife. 2016 Jul 22;5:e16413. doi: 10.7554/eLife.16413 (PMC4980113; doi:10.7554/eLife.16413)
Supplement: Figure 6—source data 2. — DOI: http://dx.doi.org/10.7554/eLife.16413.016 [file elife-16413-fig6-data2.xlsx]

## Sheet: Results qPCR
	Dip Induced
Time	Replica 1				Replica 2				Replica 3				Average
	Copy number	RNA conc (ng/µl)	Et	Et/E0	Time	Copy number	Et	Et/E0	Time	Copy number	Et	Et/E0	Et/E0	StDev
0	793641	428.5	1852.14	100	336769	382.7	879.982	100	647858	376.5	1720.74	100	100	0
5	519552	309.3	1679.77	90.6934	337580	357.7	943.752	107.247	716907	374.4	1914.82	111.279	103.073	10.9089
10	645526	393.5	1640.47	88.5719	603656	432.9	1394.45	158.463	621919	390	1594.66	92.6732	113.236	39.2214
15	332071	402.4	825.226	44.5553	277723	536.2	517.947	58.8588	337201	326.1	1034.04	60.0929	54.5023	8.63644
25	228871	429.6	532.754	28.7643	109888	379.9	289.255	32.8706	107588	320.9	335.27	19.4841	27.0396	6.85788
40	94711	344.4	275.003	14.8479	51877	535.9	96.8035	11.0006	79208	311.9	253.953	14.7584	13.5356	2.19583
	Dip Non-induced
Time	Replica 1				Replica 2				Replica 3				Average
	Copy number	RNA conc (ng/µl)	Et	Et/E0	Time	Copy number	Et	Et/E0	Time	Copy number	Et	Et/E0	Et/E0	StDev
0	721500	286	2522.73	100	900664	305.6	2947.2	100	904424	224.6	4026.82	100	100	0
3	644540	342.9	1879.67	74.5096	483740	334.4	1446.59	49.0836	597593	305.5	1956.11	48.5771	57.3901	14.8281
5	749101	411.5	1820.42	72.1606	510172	321.7	1585.86	53.8091	307175	269.6	1139.37	28.2946	51.4215	22.0303
8	563595	430.9	1307.95	51.8466	488179	322.5	1513.73	51.3618	526281	312.7	1683.02	41.7953	48.3346	5.66835
10	311366	430.9	722.595	28.6434	382279	358.2	1067.22	36.2114	282300	424.6	664.861	16.5108	27.1219	9.93804
13	171144	513	333.614	13.2243	147358	377.9	389.939	13.2308	108384	410.5	264.029	6.55677	11.004	3.8514
15	74945	502.2	149.233	5.91556	83456	346.8	240.646	8.16524	57048	455.6	125.215	3.10953	5.73011	2.53295
18	39926	441.7	90.3917	3.58309	49347	271	182.092	6.17849	28756	129.8	221.541	5.50163	5.08774	1.34629
25	42930	410.7	104.529	4.14349	18546	367.7	50.4379	1.71138	10566	377.4	27.9968	0.695259	2.18338	1.77191
28	42357	367.9	115.132	4.56378	14065	301.7	46.6192	1.58181	8683	268.4	32.351	0.803387	2.31633	1.98489
40	12481	182	68.5769	2.71836	9238	187.1	49.3747	1.67531	5762	400.6	14.3834	0.357191	1.58362	1.18325
	Calculation halflife
	a	k	t(50)	t(a/2)
Dip Induced	131.43	0.057	16.9553	12.1605
Dip Non-Induced	71.832	0.118	3.0704	5.87413
